# Supplementary material for: Suramin-Induced Neurotoxicity: Preclinical Models and Neuroprotective Strategies
Source: MDPI journal article supplement (doi:10.3390/molecules23020346), 2018-02-07
Supplement: s1 [file s1]

## Supplemental Information

**Table S1.** Effects of different inhibitors on cell viability of DRGN.

| Substance | Nimodipine (L-Type VGCC Inhibitor)                            |                |                |                |               | A 967079 (TRPA1-Inhibitor)  |                |                |                |               |
|-----------|---------------------------------------------------------------|----------------|----------------|----------------|---------------|-----------------------------|----------------|----------------|----------------|---------------|
|           | 0.1µM                                                         | 1µM            | 10µM           | 100µM          | 150µM         | 1nM                         | 10nM           | 100nM          | 1µM            | 10µM          |
| % of VEH  | 98,8<br>± 1,5                                                 | 97,8<br>± 2,5  | 96,4<br>± 2,1  | 102,3<br>± 3,0 | 93,3<br>± 4,2 | 112<br>± 2,5                | 100,9<br>± 3,1 | 101,2<br>± 2,1 | 100,6<br>± 2,3 | 95,3<br>± 4,2 |
| Substance | Efonidipine (L-Type VGCC Inhibitor)                           |                |                |                |               | HC 067047 (TRPV4 Inhibitor) |                |                |                |               |
|           | 0.1µM                                                         | 1µM            | 10µM           | 50µM           |               | 1nM                         | 10nM           | 100nM          | 1µM            | 10µM          |
| % of VEH  | 93,2<br>± 2,0                                                 | 97,8<br>± 1,4  | 90,1*<br>± 2,9 | 75,5*<br>± 3,0 |               | 105,7<br>± 2,0              | 95,4 ±<br>3,0  | 89,7*<br>± 3,1 | 96,1<br>± 2,5  | 91,2<br>± 3,2 |
| Substance | Ruthenium Red (unselective including VGCC and TRP Inhibition) |                |                |                |               | Pyr 3 (TRPC3 Inhibitor)     |                |                |                |               |
|           | 10nM                                                          | 100nM          | 1µM            | 10µM           |               | 1nM                         | 10nM           | 100nM          | 1µM            | 10µM          |
| % of VEH  | 91,9<br>± 4,3                                                 | 98,9<br>± 6,6  | 96,0<br>± 4,0  | 76,5*<br>± 3,5 |               | 100,0<br>± 3,1              | 106,9<br>± 2,2 | 105,2<br>± 4,5 | 106,0<br>± 4,9 | 97,3<br>± 3,8 |
| Substance | SNX 482 (R-Type VGCC Inhibitor)                               |                |                |                |               | Ononetin (TRPM3 Inhibitor)  |                |                |                |               |
|           | 2nM                                                           | 20nM           | 200nM          |                |               | 3nM                         | 30nM           | 300nM          | 3µM            | 30µM          |
| % of VEH  | 98,3<br>± 3,9                                                 | 102,1<br>± 2,5 | 98,1<br>± 4,4  |                |               | 100,0<br>± 2,9              | 100,4<br>± 3,4 | 98,9<br>± 3,1  | 90,5<br>± 4,5  | 92,4<br>± 3,8 |
| Substance | Ω-Conotoxin MVIIC (N-,P-,Q-Type VGCC Inhibitor)               |                |                |                |               |                             |                |                |                |               |
|           | 1nM                                                           | 10nM           | 100nM          | 1µM            |               |                             |                |                |                |               |
| % of VEH  | 99,7<br>± 3,4                                                 | 95,1<br>± 1,9  | 96,5<br>± 2,5  | 97,6<br>± 2,3  |               |                             |                |                |                |               |

\* statistically significant (p<0.05)

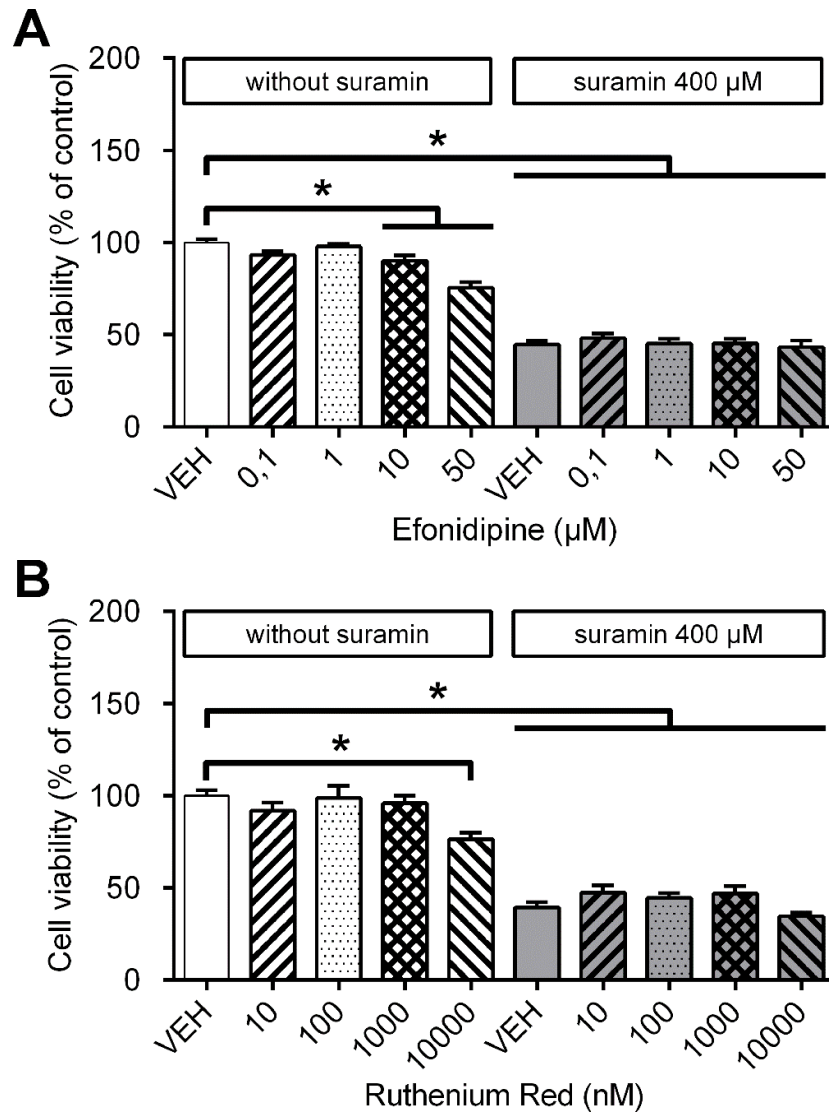

**Figure S1.** Effects of VGCC inhibitors on cell viability of DRGN.

(a) Cell viability of DRGN was markedly reduced after exposure to suramin and could not be restored by co-incubation with increasing concentrations of the L-type VGCC inhibitor Efonidipine. However, Efonidipine in concentrations  $\geq 10 \mu\text{M}$  itself reduced cell viability. (b) Similar effects were found for the unselective VGCC and TRP inhibitor Ruthenium Red, which was also toxic in higher concentrations and had no influence on cell viability when co-incubated with suramin.

**Table S2.** Effects of calpain and caspase inhibitors on cell viability of DRGN

| Substance                  | MDL 28170 (Calpain Inhibitor) |               |              |              |              | Ac DEVD CHO<br>(Caspase-Inhibitor) |              |
|----------------------------|-------------------------------|---------------|--------------|--------------|--------------|------------------------------------|--------------|
| VEH<br>(H <sub>2</sub> O)+ | 1nM                           | 10nM          | 100nM        | 1µM          | 10µM         | 1µM                                | 10µM         |
| % of VEH                   | 99,6<br>±5,0                  | 104,3<br>±3,2 | 95,3<br>±4,0 | 93,3<br>±4,5 | 89,7<br>±3,1 | 95,5<br>±5,7                       | 91,8<br>±5,7 |
| SUR 400<br>µM+             | 1nM                           | 10nM          | 100nM        | 1µM          | 10µM         | 1µM                                | 10µM         |
| Δ% of<br>SUR/VEH           | -7,1<br>±2,4                  | +2,0<br>±3,6  | -2,9<br>±3,1 | +5,3<br>±4,0 | +3,8<br>±3,3 | +6,0<br>±3,2                       | +3,8<br>±2,0 |

\* statistically significant (p<0.05)

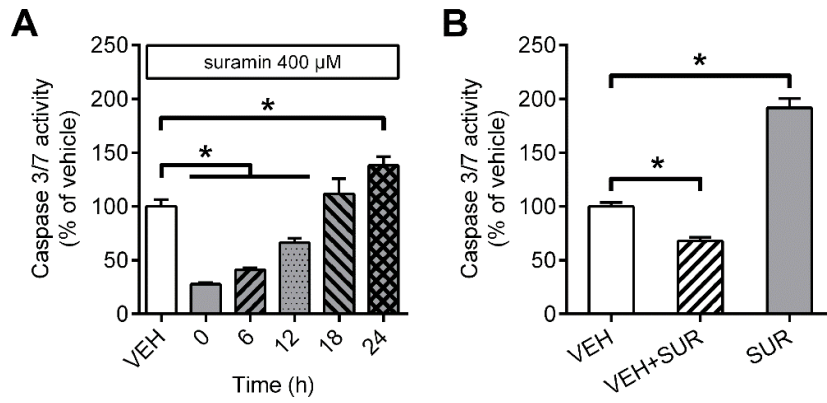

**Figure S2:** Caspase-3/7 activity of DRGN after suramin treatment.

(a) Caspase 3/7 activity was measured with a luminescent caspase assay. After incubation of DRGN cultures with suramin for 0, 6 and 12 h a significantly reduced luminescent signal was detected. However, the signal was significantly increased after suramin incubation for 24 h. (b) When DRGN were incubated with vehicle for 24 h and suramin was thereafter added to the culture immediately before luminescence signal detection (VEH+SUR), a decrease of caspase activity was observed, suggesting that suramin quenches the luminescence signal. Again, an increase in caspase-3/7 activity was observed when DRGN were treated with suramin for 24 h.
